# Supplementary material
Source: PubMed Central journal article supplement (PMC7732814)
Supplement: mmc2.pdf [file mmc2.pdf]

# C-Terminal Tail Polyglycylation and Polyglutamylation Alter Microtubule Mechanical Properties

Kathryn P. Wall,<sup>1,2</sup> Harold Hart,<sup>3</sup> Thomas Lee,<sup>1</sup> Cynthia Page,<sup>4</sup> Taviare L. Hawkins,<sup>3</sup> and Loren E. Hough<sup>2,5,\*</sup>

<sup>1</sup>Department of Biochemistry and <sup>2</sup>BioFrontiers Institute, University of Colorado Boulder, Boulder, Colorado; <sup>3</sup>Physics Department, University of Wisconsin La Crosse, La Crosse, Wisconsin; and <sup>4</sup>Molecular, Cellular and Developmental Biology and <sup>5</sup>Department of Physics, University of Colorado Boulder, Boulder, Colorado

**ABSTRACT** Microtubules are biopolymers that perform diverse cellular functions. Microtubule behavior regulation occurs in part through post-translational modification of both the  $\alpha$ - and  $\beta$ -subunits of tubulin. One class of modifications is the heterogeneous addition of glycine and/or glutamate residues to the disordered C-terminal tails (CTTs) of tubulin. Because of their prevalence in stable, high-stress cellular structures such as cilia, we sought to determine if these modifications alter microtubules' intrinsic stiffness. Here, we describe the purification and characterization of differentially modified pools of tubulin from *Tetrahymena thermophila*. We found that post-translational modifications do affect microtubule stiffness but do not affect the number of protofilaments incorporated into microtubules. We measured the spin dynamics of nuclei in the CTT backbone by NMR spectroscopy to explore the mechanism of this change. Our results show that the  $\alpha$ -tubulin CTT does not protrude out from the microtubule surface, as is commonly depicted in models, but instead interacts with the dimer's surface. This suggests that the interactions of the  $\alpha$ -tubulin CTT with the tubulin body contributes to the stiffness of the assembled microtubule, thus providing insight into the mechanism by which polyglycylation and polyglutamylation can alter microtubule mechanical properties.

**SIGNIFICANCE** Microtubules are regulated in part by post-translational modifications, including the heterogeneous addition of chains of glycine and glutamate residues to the C-terminal tails. By producing and characterizing differentially modified tubulin, this work provides insight into the molecular mechanisms of how these modifications alter intrinsic microtubule properties, such as flexibility. These results have broader implications for revealing how ciliary structures are able to function under high stress.

## INTRODUCTION

Microtubules are biopolymers involved in diverse cellular processes, including mitosis, transport and signaling, assembly of cilia and flagella for movement, and the cellular cytoskeleton structure (1–5). This diversity of function is enabled by post-translational modifications (6,7). Modifications can occur on both the ordered core of the tubulin molecules or the disordered C-terminal tails (CTTs) of the  $\alpha$ - and  $\beta$ -tubulin monomers (summarized in Fig. 1). Functionally different subsets of microtubules vary in the degree and type of post-translational modification. For example, acetylation on the lumen of microtubules is common in stable microtubules (9) and is thought to

protect these long-lived microtubules from buckling (10). Microtubule stability is also correlated with deetyrosination, which removes of the C-terminal tyrosine from  $\alpha$ -tubulin (11,12). Microtubules undergoing the dynamic process of mitosis contain mainly tyrosinated tubulin (13), whereas the stable and longer-lived microtubules in neurons and cardiomyocytes contain predominantly deetyrosinated tubulin (14).

Post-translational tubulin modifications can tune intrinsic microtubule properties, such as flexibility, stability, and polymerization and depolymerization rates. Acetylation increases the mechanical resilience and flexibility of microtubules protecting long-lived microtubules from damage (10). Axonemal microtubules have slower growth and lower catastrophe frequency compared with bovine brain microtubules (15). However, samples with distinct patterns of post-translational modifications prepared by fractionating axonemes show indistinguishable rates of microtubule polymerization (15).

Submitted October 2, 2019, and accepted for publication September 25, 2020.

\*Correspondence: [hough@colorado.edu](mailto:hough@colorado.edu)

Editor: David Sept.

<https://doi.org/10.1016/j.bpj.2020.09.040>

© 2020 Biophysical Society.

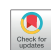



## Mass spectrometry of tubulin from *T. thermophila*

Purified tubulin samples were reduced, alkylated, and digested with trypsin ( $\alpha$ ) or chymotrypsin ( $\beta$ ). Samples were resolved using a Waters nanoAcquity UPLC. Chromatographic separation was performed with a BEH C18 reversed-phase column (250 mm  $\times$  75  $\mu$ m, 1.7  $\mu$ m, 130 Å; Waters, Milford, MA), using a linear gradient from 95% Buffer A (0.1% formic acid) into 35% Buffer B (0.1% formic acid, 99.9% acetonitrile) over 60 min at a flow rate of 300 nL/min. Tandem mass spectrometry (MS/MS) was performed using an linear trap quadrupole (LTQ) Orbitrap mass spectrometer, scanning between 150 and 2000 m/z (60,000 resolution), and the top six most intense precursor ions were selected for MS/MS sequencing using monoisotopic precursor selection, rejecting singly charged ions. Dynamic exclusion was used with a repeat count of one, a repeat duration of 30 s, an exclusion duration of 180 s, and an exclusion mass width of 20 ppm. The maximal injection time for Orbitrap parent scans was 500 ms with a target automatic gain control of  $1 \times 10^6$ . The maximal injection time for LTQ MS/MS scans was 250 ms, with a target automatic gain control of  $1 \times 10^4$ . The normalized collision energy was 35% with an activation Q of 0.25 for 30 ms.

## Microtubule assembly

Microtubules were assembled in PIPES-based BRB80 (80 mM PIPES (pH 6.7), 1 mM MgCl<sub>2</sub>, and 1 mM EGTA) supplemented with 2 mM GTP (Sigma-Aldrich, St. Louis, MO) at 37°C for 1 h and then incubated at room temperature for at least 30 min. Starting tubulin concentration ranged from 1 to 10  $\mu$ M. Samples for fluorescent bending measurements were supplemented with 10% rhodamine-labeled porcine brain tubulin (Cytoskeleton, Denver, CO). The resulting microtubules were spun down at  $16,300 \times g$  in a table-top microcentrifuge. Pelleted microtubules were resuspended in BRB80 supplemented with 10  $\mu$ M taxol. High magnesium conditions were supplemented to 5, 10, or 50 mM MgCl<sub>2</sub>.

## Electron microscopy of microtubules

After assembly, the microtubules were spun at  $16,300 \times g$  in a table-top microcentrifuge. The microtubules were resuspended in BRB80 supplemented with 10  $\mu$ M taxol. Approximately 4  $\mu$ L of undiluted or diluted (1:10) microtubules were adsorbed to glow discharged holey-carbon C-flat grids (Protochips, Morrisville, NC) for 10–30 s, blotted with Whatman filter paper, and immediately plunge frozen into liquid ethane using a homemade plunge-freezing device. Frozen samples were transferred under liquid nitrogen to a Gatan-626 cryo-holder (Gatan, Pleasanton, CA). Cryo-electron microscopy data were collected on an FEI Tecnai F20 FEG transmission electron microscope (FEI, Hillsboro, CO) operating at 200 kV. Images were collected at a magnification of 29,000 $\times$  and a defocus of  $-4.0 \mu$ m using a total dose of 33 electrons/Å<sup>2</sup>. Images from wild-type microtubules were recorded binned by two on a 4K  $\times$  4K Gatan Ultrascan 895 CCD camera (Gatan). With this camera at a microscope magnification of 29,000 $\times$ , the resulting pixel size corresponds to 7.6 Å on the specimen. Images from the TTLL3(A-F)-KO microtubules were taken on the same microscope, which was fitted with a 24 megapixel, 5.7K  $\times$  4.1K Gatan K3 camera (Gatan). Images were collected at a microscope magnification of 11,500 $\times$  and a defocus of  $-3.5 \mu$ m using a total dose of 38 electrons/Å<sup>2</sup>. With this camera, the images were recorded binned by two with a resulting pixel size on the specimen of 6.2 Å. Each image was captured as 50 frame videos (0.76 electrons/Å<sup>2</sup>/frame) and aligned using SerialEM software (33). This software was also used to automate the data acquisition and minimize exposure of the specimen to the electron beam.

## Fluorescence microscopy

All microtubules were assembled in BRB80, as described above. Microtubules were diluted at least 20-fold for imaging in the relevant buffer, with

the addition of an oxygen scavenging system (0.5%  $\beta$ -mercaptoethanol, 4.5 mg/mL glucose, 0.2 mg/mL glucose oxidase, and 0.035 mg/mL catalase), 10  $\mu$ M taxol to stabilize the microtubules (Sigma Paclitaxel), and 1% pluronic F-127 to inhibit sticking to the slide or coverslip (Sigma). 0.25  $\mu$ L of the dilution was sealed with epoxy between a glass coverslip and glass slide and kept in the dark unless being imaged. Slides and coverslips were cleaned in a bath sonicator in 100% ethanol for 45 min and soaked in 100% ethanol until use. The slides and coverslips were flamed to dry immediately before use. Fluorescence bending images were acquired using a Nikon Confocal Spinning Disk with a 1.45 NA 100 $\times$  oil objective (Nikon) and Andor 888 Ultra EMCCD camera. Videos were acquired for at least 100 frames. There was a 1 s delay between frames with a 100 ms exposure time.

## Analysis of flexural rigidity

All videos were cropped to contain a single microtubule using ImageJ (34). Less than 10% of the total number of frames were removed if the microtubule drifted out of the z-plane or if any other particles obstructed the microtubule during imaging. Single microtubules were analyzed by previous methods (35–37). In short, the variances in the magnitude of the first 25 normal mode were measured using a customized MATLAB (The MathWorks, Natick, MA) script. To determine the uncertainty in the measured variance, bootstrapping statistics was employed using R (38) as previously described (35). Average persistence lengths were determined by fits to the cumulative distribution function (Fig. S5; Table S1).

## <sup>15</sup>N-relaxation NMR ( $R^1/R^2$ )

Tubulin was purified from wild-type *T. thermophila* grown in minimal bacterized media, as previously described for isotopic labeling (8). GST-CTT peptides were expressed and purified as previously described (8). T<sub>1</sub> and T<sub>2</sub> relaxation experiments were performed using the standard <sup>15</sup>N-HSQC experiment from the Varian BioPac (gNhsqc) on an 800 MHz magnet. For measurement of T<sub>1</sub>, relaxation delays used were as follows: 0, 0.1, 0.2, 0.3, 0.4, 0.5, 0.6, 0.7, 0.8, and 0.9 ms. For the measurement of T<sub>2</sub>, relaxation delays used were as follows: 0.01, 0.03, 0.05, 0.07, 0.09, 0.11, 0.13, 0.15, 0.17, 0.19, 0.21, 0.23, and 0.25 ms. The data were processed using standard scripts in NMRPipe and analyzed using CCPNmr Analysis software (39).

## RESULTS AND DISCUSSION

### Creation and characterization of differentially modified pools of tubulin

To obtain samples with different modifications, we took advantage of existing *T. thermophila* strains created to study the biological role of CTT modifications (26,29,40). We purified tubulin from three strains, giving primarily polyglycylated tubulin (wild-type), primarily polyglutamylated tubulin (TTLL3(A-F)-KO), and tubulin with polyglycylation only on the  $\beta$ -tubulin CTT (ATU1-6D) (Fig. 2, A–C). As we published previously, tubulin purified from our wild-type strain is primarily polyglycylated (8).

To obtain polyglutamylated tubulin, we purified tubulin from a strain with all members of the TTLL3 family of enzymes deleted (29). We refer to this strain as TTLL3(A-F)-KO or polyglutamylated. Strains lacking the glycine ligases showed increased levels of polyglutamylation (29). This strain has shorter cilia, slower growth rates, and increased

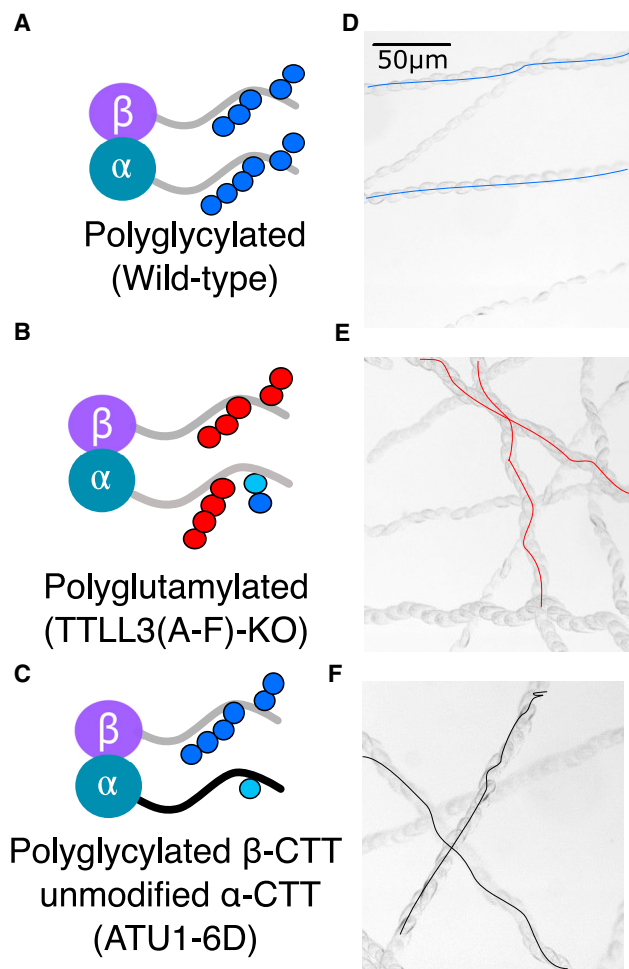

**FIGURE 2** Overview of the strains used and resulting predominant post-translational modifications observed in tubulin purified from each strain. (A–C) The samples were primarily polyglycylated (wild-type), polyglutamylated (TTLL3(A-F)-KO), or polyglycylated only on the  $\beta$ -tubulin CTT (ATU1-6D). (D–F) Time-lapse images showing the trajectory of typical swimming *T. thermophila* cells are shown. The two mutant strains have ciliary defects and abnormal swimming patterns. To see this figure in color, go online.

resistance to stabilization by taxol (29). We observed a disrupted swimming pattern (Fig. 2 E), which was most likely because of changes in the ciliary length and organization.

To obtain tubulin that was polyglycylated on only  $\beta$ -tubulin, we purified tubulin from a strain in which the last six glutamate residues of  $\alpha$ -tubulin were mutated to aspartate (ATU1-6D) (26). We previously mapped the sites of polyglycylation to these residues and did not observe polyglycylation on the other glutamate residues in the  $\alpha$ -tubulin CTT (8). The aspartate substitutions retain the overall charge of the tail but are not an efficient substrate for the TTLL enzymes (26). This strain has slower swimming speeds (26) and disrupted swimming patterns (Fig. 2 F), although they are able to grow well enough for the purposes of purification of tubulin.

The levels of polyglutamylated tubulin in each preparation were measured by Western blot using an antibody specific to polyglutamylated tubulin. We detected polyglutamylated tubulin purified from all three strains tested by Western blot (Fig. S2), including the wild-type strain in which polyglutamylated tubulin was not previously observed by either mass spectrometry or NMR (8). The tubulin purified from TTLL3(A-F)-KO has significantly higher levels of polyglutamylated tubulin on both tails than the other two strains, which is as expected because of previous observations of hyperglutamylated tubulin in whole cell lysates of TTLL3(A-F)-KO cells (23,29). We detected little polyglutamylated tubulin on  $\alpha$ -tubulin purified from the ATU1-6D strain, as expected because all modification sites were mutated. However, the levels of polyglutamylated tubulin detected on  $\beta$ -tubulin from ATU1-6D cells is similar to the wild-type. Polyglutamylated peptides were difficult to detect by mass spectrometry but were observed in samples purified from TTLL3(A-F)-KO cells.

We then measured the degree of polyglycylation using both Western blot and mass spectrometry. We used antibodies to monoglycylated tubulin (TAP952) and polyglycylated tubulin (AXO49), which are specific to mono- or polyglycylation, respectively (Fig. S2). As previously determined by mass spectrometry, the tubulin purified from wild-type *T. thermophila* contained both mono- and polyglycylation (8). Both tails on  $\alpha$ - and  $\beta$ -tubulin have significant polyglycylation. Because modification levels are thought to be different on the cilia relative to the rest of the cell, we deciliated cells and purified tubulin separately from the ciliary and cell body fractions. Unexpectedly, as measured by mass spectrometry, the levels of polyglycylation were similar between tubulin purified from cell bodies and from shed cilia (Fig. 3, A and B). However, there were subtle differences. We observed a higher prevalence of peptides containing many (~20) glycine additions in tubulin samples purified from cilia than from the cell body.

We detected no mono- or polyglycylation in tubulin purified by the same protocol from the TTLL3(A-F)-KO strain by Western blot. This is as expected because the enzymes responsible for the ligation of glycine residues were deleted from the micronucleus (29). However, by mass spectrometry, we detected peptides corresponding to both mono- and polyglycylation on the  $\alpha$ -tubulin CTT. The low levels of polyglycylation are presumed to be from residual DNA coding for the TTLL3 enzymes in the macronucleus or could potentially be due to another polyglycylation enzyme. As measured by mass spectrometry, TTLL3(A-F)-KO tubulin has no detectable polyglycylation on the  $\beta$ -tubulin CTT.

Tubulin purified from the ATU1-6D strain and levels of mono- and polyglycylation on the  $\beta$ -tubulin subunit were very similar to those seen in our wild-type cells. We observed low levels of monoglycylation on the  $\alpha$ -tubulin subunit by Western blot. This was unexpected because all



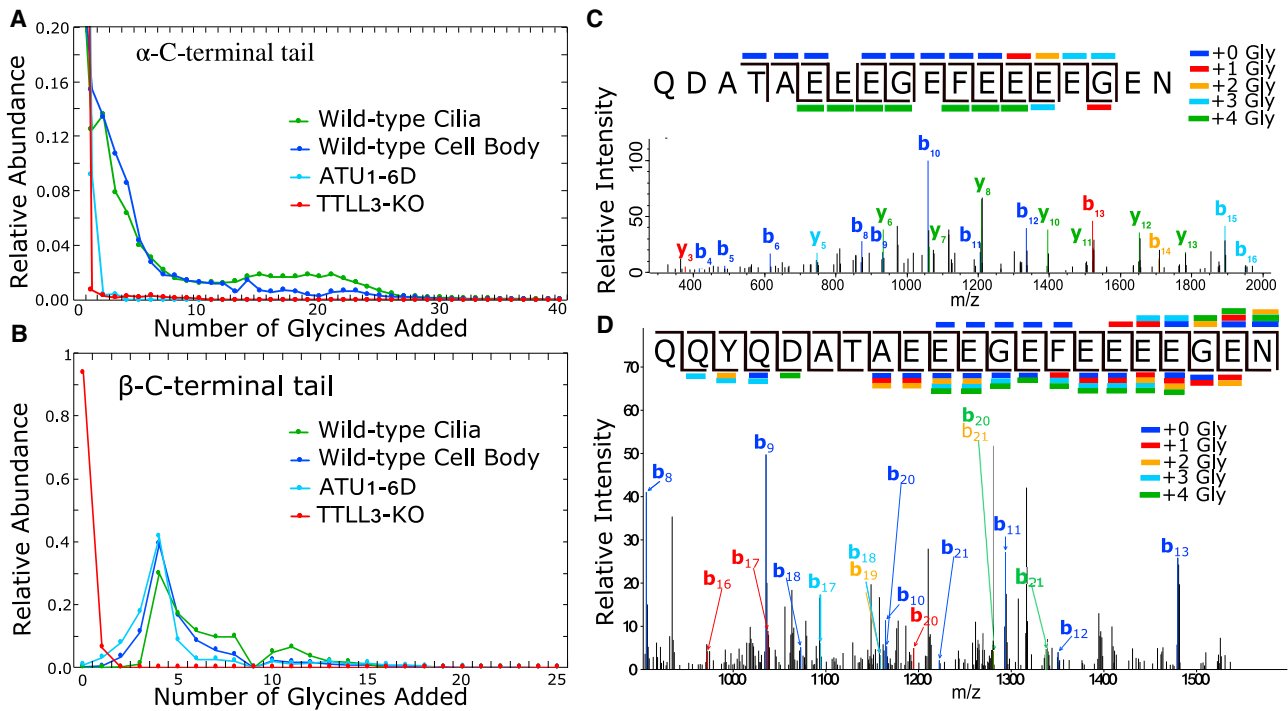

**FIGURE 3** Mass spectrometry characterization of the polyglycylation patterns on differentially modified tubulin samples. For the wild-type samples, we purified tubulin from both ciliary and cell body fractions. (A and B) We measured the total ion current corresponding to trypsin ( $\alpha$ ) or chymotrypsin ( $\beta$ ) C-terminal peptides, which include the disordered CTTs. We found a peak in the  $\beta$ -tubulin tail sample of four additional glycines. We mapped the glycine additions of this parent peptide using MS/MS (41,42). (C) An example MS/MS scan shows fragmentation consistent with a single glycine on each of the four terminal glutamates. (D) Shown is a different MS/MS scan containing fragments corresponding to a wide range of glycine localizations. Fragmentation of the modification itself is thought to contribute to the diversity of y ions. We did not observe b ions consistent with modifications upstream of the four terminal glutamates. To see this figure in color, go online.

glutamate residues that we had previously determined to be sites of modification on the  $\alpha$ -tubulin CTT were mutated in this strain to aspartates (Fig. S2; (8)). By mass spectrometry, we detected monoglycylation on the introduced aspartate residues and not on any residues further upstream on the  $\alpha$ -CTT (data not shown). Therefore, the TTLL3 glycine ligases appear to be able to modify the aspartate residues, albeit at a very low level. Interestingly, we detected tyrosinated ATU1-6D  $\alpha$ -tubulin in addition to detyrosinated ATU1-6D  $\alpha$ -tubulin; we have not detected the peptide containing the terminal tyrosine residue in any of our other samples.

We measured the total ion current corresponding to tryptic or chymotryptic peptides with varying numbers of glycine additions for all three strains and found a strong preference for the addition of four glycine residues to the  $\beta$ -tubulin CTT in wild-type and ATU1-6D cells (Fig. 3, A and B; (41,42)). We then analyzed the distribution of glycine residues on this species. The fragmentation pattern in MS/MS experiments of the peptides with four added glycine residues was very heterogeneous (Fig. 3, C and D; Fig. S3). We obtained strong evidence for several different arrangements of the four glycine residues. For example, we were able to identify fragments that strongly support the presence of a

species with one glycine on each of the last four glutamates from the peptide from ATU1-6D (Fig. 3 C). We also identified MS/MS fragments corresponding to several other heterogeneous arrangements in this ATU1-6D tubulin peptide (Fig. 3 C), including all four glycine residues being on the last glutamate residue. However, the fragmentation of not just the tail peptide but also the modification itself confounded our analysis. Although we found y ions giving evidence of fewer than four additional glycines in the MS/MS fragments, we did not find b ions containing positive evidence of glycine modifications upstream of the final five glutamates. We conclude that the primary sites of modification are the five C-terminal glutamates, which is similar to the previous mapping of wild-type tubulin (8).

From both the Western blot and mass spectrometry analysis, we conclude that we have three distinct subsets of differentially modified tubulin: 1) polyglycylation of tubulin from wild-type *T. thermophila*, 2) polyglutamylated tubulin from TTLL3(A-F)-KO *T. thermophila*, and 3) tubulin polyglycylation on only the  $\beta$ -tubulin CTT, with an unmodified  $\alpha$ -tubulin CTT from ATU1-6D *T. thermophila*. These modifications are summarized in Fig. 2. With these tools in place, we sought to determine

the role of polyglutamylation and polyglycylation on microtubule mechanical properties.

### Microtubule flexibility depends on the post-translational modifications present on the CTTs

To test the hypothesis that microtubule stiffness varies between differentially modified microtubules, we measured the persistence length ( $L_p$ ) of freely fluctuating microtubules from each of our three tubulin pools using fluorescence microscopy, as was done previously (35–37,43). We analyzed the distribution of contributions of each normal mode to the microtubule shape (43). We acquired frames every second for 8 min. The frames were approximately uncorrelated. We used bootstrapping to ensure good error estimation and for the robustness of the analysis (35). From the measurements, we determined the average microtubule persistence length, which is a measure of the stiffness of a filament. A stiffer filament has a higher persistence length, whereas a lower persistence length means a more flexible filament. Consistent with previous work, we found no dependence of persistence length on contour length (35,37,43,44), which ranged from 10 to 45  $\mu\text{M}$  (Fig. 4; Fig. S4).

We tested whether differences in CTT post-translational modifications, in particular polyglycylation and polyglutamylation, affected the stiffness of microtubules. As done previously, we fit the range of persistence length values to the cumulative distribution functions (36). We used the nonparametric Kolmogorov-Smirnov statistical test (45) and found that all of our data were better described by a log-normal distribution than a normal distribution. The fit parameters and pairwise  $p$ -values for all of the data are listed in Tables S1 and S2. In addition, we determined the average persistence length as  $\langle L_p \rangle = \exp(\langle \ln(L_p) \rangle)$  (Fig. 4), with the most significant difference being between polyglutamylated and polyglycylylated microtubules ( $p = 0.045$ ).

Microtubules from *T. thermophila* tubulin (in 1 mM  $\text{MgCl}_2$ ) ranged in average persistence lengths from

$L_p = 2.0 \pm 0.19$  mm for polyglycylylated microtubules ( $n = 21$ ) to  $L_p = 3.18 \pm 0.41$  mm for polyglutamylated microtubules ( $n = 23$ ). As expected, microtubules with polyglycylylated  $\beta$ -tubulin CTTs have average persistence length values situated between the values of polyglutamylated and polyglycylylated at  $2.63 \pm 0.53$  mm ( $n = 19$ ).

In addition, the spread of the data ( $\sigma$ ) is larger for polyglycylylated as compared with polyglutamylated tubulin (Fig. 4 B). For polyglycylylated microtubules,  $\sigma = 1.47 \pm 0.07$  more than twice the value for polyglutamylated microtubules  $\sigma = 0.60 \pm 0.04$ . Continuing the trend, the microtubules with polyglycylylated  $\beta$ -tubulin CTTs are intermediate between the two other pools of tubulin with  $\sigma = 0.94 \pm 0.04$ .

Polyglycylylated microtubules, the most flexible that we measured, are almost twofold stiffer than taxol-stabilized rhodamine-labeled porcine tubulin ( $1.19 \pm 0.04$  mm) (35–37). The differences between porcine and *T. thermophila* tubulin could be attributed to sequence and structural differences between the two species of tubulin. In addition, porcine brain tubulin contains a mixture of post-translational modifications that are different from our samples, including the potential acetylation, which is known to reduce microtubule stiffness (9,10). However, our samples do not have significantly less acetylation than reported values for bovine brain tubulin ( $\sim 30\%$  acetylated) (46).

Using mass spectrometry data, we semiquantitatively compared the ratio of ion currents to determine the level of acetylation in our samples. The level of acetylation in our wild-type sample was 50%, our ATU1-6D sample was  $\sim 16\%$ , and our TTLL3(A-F)-KO was at 37%. There does not appear to be a strong correlation between stiffness and acetylation levels in our samples, in contrast to previous work (10).

We sought to determine whether magnesium would affect bending rigidity differently for our polyglycylylated and polyglutamylated microtubules. Divalent salts have been shown to affect microtubule bending rigidity in a

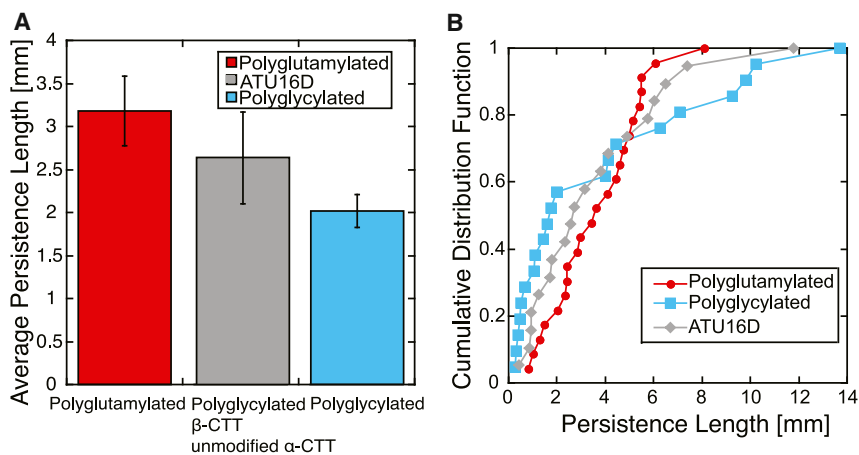

FIGURE 4 Measured microtubule persistence lengths of our three differentially modified tubulins. (A) The mean of the persistence lengths measured as  $\langle L_p \rangle = \exp(\langle \ln(L_p) \rangle)$  and the data are well described by a log-normal distribution. (B) Cumulative distribution functions for our different microtubule populations are shown. To see this figure in color, go online.

CTT-dependent manner, with 5 mM MgCl<sub>2</sub> increasing the stiffness of mammalian tubulin by ~50% (47). The high negative charge of the tails is thought to be important for their contribution to the salt dependence. Microtubule polyglutamylation adds significant charge to the CTTs, whereas polyglycylation does not and may instead act as a steric barrier to prevent charges from approaching each other. Furthermore, divalent salt concentration affects the flexibility of microtubules, which may be a result of changes in the conformation of the CTTs (47). We performed similar measurements as above of persistence length of polyglycylation versus polyglutamylated microtubules in varying concentrations of magnesium (1, 5, 10, and 50 mM MgCl<sub>2</sub>). All microtubules were assembled in 1 mM MgCl<sub>2</sub>, and then, additional magnesium was added before measuring the bending stiffness.

We saw an increase in persistence length upon the addition of moderate concentrations of magnesium for polyglycylation microtubules (Fig. 5), consistent with previous observations (47). Particularly notable is the strong increase in stiffness of polyglycylation microtubules at 10 mM MgCl<sub>2</sub>, which increases to a persistence length of  $4.43 \pm 1.16$  mm ( $n = 31$ ). However, the stiffness of polyglutamylated microtubules was not significantly changed in 5 or

10 mM MgCl<sub>2</sub> as compared with 1 mM MgCl<sub>2</sub>. As a result, in 10 mM MgCl<sub>2</sub>, the polyglycylation microtubules were significantly stiffer than the polyglutamylated ones.

When the magnesium concentration was further increased to 50 mM, the stiffness decreased, and the persistence lengths became statistically similar between polyglutamylated and polyglycylation microtubules. Interestingly, a small subset of both polyglycylation and polyglutamylated microtubules had persistence lengths of greater than 10 mm in 50 mM MgCl<sub>2</sub> (Fig. 5). We could not identify a biological reason for these stiffer filaments; they did not appear to be bundled or to incorporate a different concentration of fluorescently labeled tubulin. Contrary to our expectation, the polyglycylation microtubules showed more significant changes in bending rigidity upon increasing magnesium than did the polyglutamylated ones. The differences in the effect of polyglycylation and polyglutamylation on microtubule stiffness may be due to the conformation of the CTTs on the surface. Polyglycylation tails are hypothesized to adopt a collapsed conformation (48). Very high magnesium concentrations are proposed to disfavor this conformation and promote a more extended conformation, reducing interactions with the surface (47).

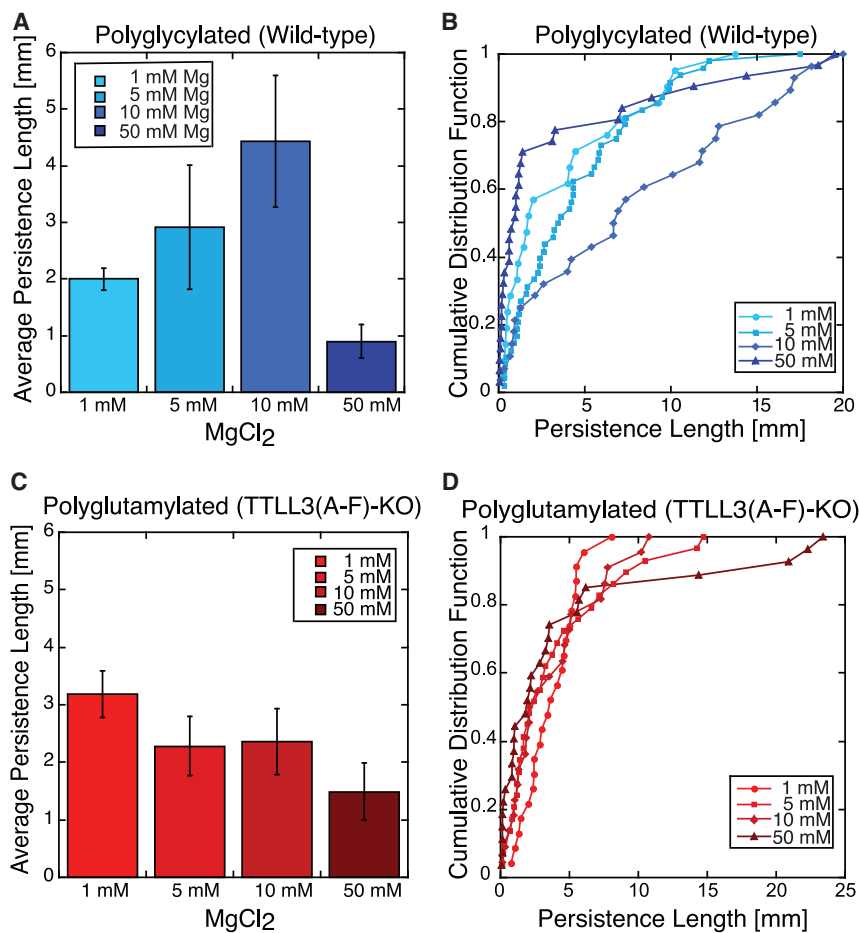

FIGURE 5 Measured persistence lengths of our differentially modified microtubules at different concentrations of magnesium. Shown are the mean persistence length (A and C) and cumulative distribution plots (B and D) of tubulin purified from the wild-type (polyglycylation) tubulin (A and B) and TTLL3 knockout (polyglutamylated) tubulin (C and D). To see this figure in color, go online.

### Differentially modified microtubules incorporate similar numbers of protofilaments

Next, we tested whether differences in bending rigidity of the different microtubule pools could be explained by structural differences in assembled microtubules. In mammalian tubulin, microtubules containing different numbers of protofilaments showed different microtubule flexural rigidity (36). We used electron microscopy to determine if tubulin modifications caused changes in the number of protofilaments incorporated into microtubules. We considered only the wild-type and TLL3(A-F)-KO strains, which are primarily polyglycylated and polyglutamylated, respectively. The number of protofilaments per microtubule is typically 13 in cells but can vary from 9 to 17 under *in vitro* polymerization conditions (49). In electron cryo-microscopy images, the number of protofilaments in each microtubule can be determined from the unique helical pitch and moiré patterns of each microtubule type (49). We counted the number of protofilaments for wild-type (glycylated) and TLL3(A-F)-KO (glutamylated) ( $n = 145$  and  $n = 96$  microtubules, respectively) (Fig. 6).

The two differentially modified microtubule subsets have indistinguishable distributions of protofilament number (Kolmogorov-Smirnov test  $p$ -value = 0.97). Most contain 14–15 protofilaments as is typically seen in *in vitro* polymerization (49). We conclude that the observed differences in flexibility are due to the molecular-level interactions of the CTTs rather than differences in the overall size or structure of assembled microtubules.

### Spin dynamics suggest interactions of the $\alpha$ -tubulin CTT with the tubulin body

To probe the molecular-level interactions of the CTTs, we used NMR spectroscopy, which is sensitive to transient interactions characteristic of intrinsically disordered domains. In particular, differences in NMR relaxation measurements in different conditions can be indicative of changes in chain dynamics and interactions (50). As measured by NMR, the highly dynamic regions of the tails are 15 amino acids long for the  $\alpha$ -tubulin CTTs (EVGIETAEGEGEEEG) and 15 for the  $\beta$ -tubulin CTTs (ATAEEEGEFEEEEGEN) (8). This is a larger region than expected for both the  $\alpha$ -tubulin and  $\beta$ -tubulin CTTs based on sequence conservation (51) and previous x-ray crystal structures (52,53), in which electron density has been observed in some, but not all, structures of tubulin for the residues corresponding to the first three amino acids visible in our NMR spectroscopy experiments.

We performed  $R_1$  and  $R_2$  NMR  $^{15}\text{N}$ -relaxation experiments to probe the local dynamics of the CTTs in the presence of the tubulin dimer (54,55). NMR spin relaxation experiments give information about the dynamics of each residue of the CTTs. We compared the NMR spin dynamics

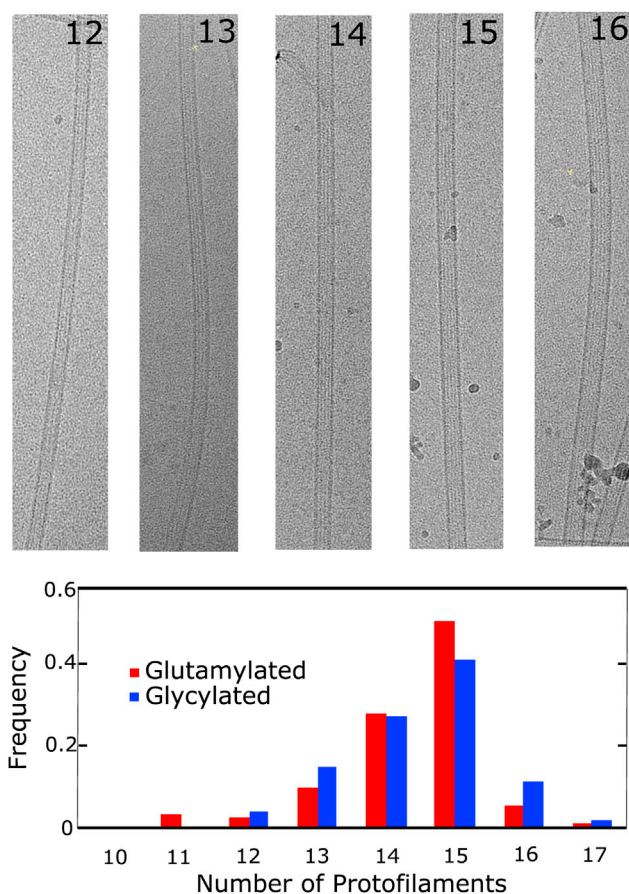

FIGURE 6 Electron microscopy representative images of varying protofilament number (top). Shown is the normalized distribution of protofilament numbers for polyglycylated (blue) versus polyglutamylated (red) microtubules (bottom). The two distributions are similar, giving a  $p$ -value of 0.97 by the Kolmogorov-Smirnov test. To see this figure in color, go online.

of the atoms in the CTTs of the tubulin heterodimer with the same residues on peptides expressed attached to GST homodimers (the  $\alpha$  and  $\beta$  GST-fusion constructs were measured in different experiments) (Fig. 7). Our low sample concentration values, coupled with typically low values for disordered domains, reduced the utility of heteronuclear  $^1\text{H}$ - $^{15}\text{N}$  experiments, which were all below noise (NOE values  $< 0.6$ ). As a result, we did not attempt to apply quantitative interpretations based on the combination of the spin relaxation measurements. Fig. 7 shows the values of the  $R_1$  and  $R_2$  relaxation rates of the two CTTs plotted as a function of the amino acid position. The shaded lines are linear fits to guide the eye. We compared the measured values for the CTTs as part of the tubulin dimer in our wild-type or primarily polyglycylated sample and of the CTTs as unmodified peptides, each individually attached to GST dimers, to mimic their N-terminal attachment. The latter gives an indication of the intrinsic differences due to the amino acid sequence and not to any interactions as part of the full dimer or as a result of post-translational modifications.



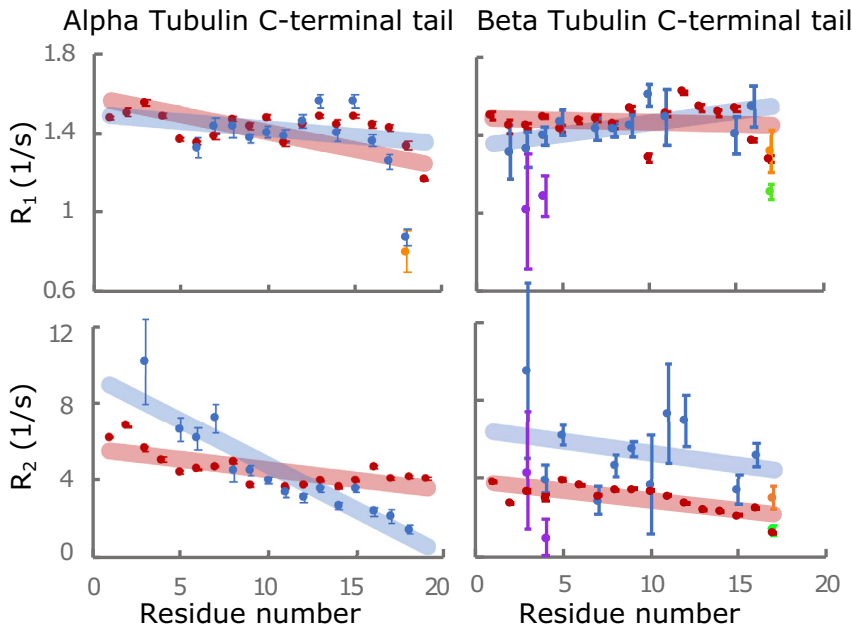

FIGURE 7 NMR spin relaxation measurements of CTTs. Shown are the  $R_1$  (top row) and  $R_2$  (bottom row) relaxation rates for  $\alpha$ - (left) and  $\beta$ - (right) tubulin CTTs as peptides attached to GST (red) or as part of the full tubulin dimer (blue, orange, yellow, and green). Several residues in our NMR spectra are present in two different chemical environments (8). For residues near the C-termini, these correspond to the modification state (orange: polyglycylation of the i-1 residue, green: monoglycylation of the i-1 residue). For residues near the N-termini, one set of peaks is brighter (blue) and the other dimmer (purple). To see this figure in color, go online.

We see a clear trend as a function of distance from the tubulin body in the  $\alpha$ -tubulin CTT values of  $R_2$ , which is not apparent in either  $R_1$  of  $\alpha$ - or  $R_1$  or  $R_2$  of  $\beta$ -tubulin. Increased values of  $R_2$  are typically taken as an indication of increased interactions of the appropriate timescale, and so we conclude that the more N-terminal portions of the  $\alpha$ -tubulin CTT interact more significantly with the tubulin body than do residues on the tail further from the surface. The values of  $R_2$  for the  $\beta$ -tubulin CTT were in general higher than those for the peptide, indicating the presence of some interaction. However, the overall trend was similar to that of the peptide, which indicates that these values are dominated by local interactions, rather than interactions with the tubulin dimer surface. In contrast, the  $R_1$  relaxation values, typically attributed to the overall motion of individual bonds, are almost identical between the peptide and CTT of the  $\alpha$ -tubulin.

Our NMR spectrum contains more than one resonance for several of the residues in the CTT. At the C-terminal extreme, we can distinguish species according to the modification state of the adjacent residue. For example, the terminal asparagine on  $\beta$ -tubulin is present in our sample in three species of differing modification states (Fig. 7; Fig. S6). The measured relaxation rates differ based on the modification state, with both  $R_1$  and  $R_2$  being larger for polyglycylation residues relative to either the unmodified or monoglycylation residues.

Residues of the tail near the tubulin body are also present in two environments, which we attributed to differences in the environment of the underlying tubulin body, although we have not been able to determine the source of these differences (8). For the  $\beta$ -tubulin CTT, the segment from residues  $\beta$ -tubulin 428–432 (ATAE) is present in two groups corresponding to two different environments for this

segment. Interestingly, the relaxation values were easy to measure for one of the groups and are shown in blue with the rest of the chain in Fig. 7. The other group is the dimmer and more overlapped with other peaks in the spectrum. The apparent difference in relaxation rates between the two groups is further evidence of these residues having different interactions with the tubulin body.

## CONCLUSIONS

Post-translational modifications of tubulin dimers have been linked to both intrinsic and extrinsic properties of microtubules (6,7). In this study, we investigated the effect of polyglycylation and polyglutamylation on the intrinsic flexural rigidity of microtubules. We purified tubulin out of three different *T. thermophila* strains, producing three pools of differentially modified tubulin: 1) from wild-type cells, we purified primarily polyglycylation tubulin; 2) from TLL3 knockout cells lacking all tubulin mono- and polyglycylation, we purified primarily polyglutamylation; and 3) from ATU16D cells, we purified protein that is polyglycylation on the  $\beta$ -tubulin CTT and primarily unmodified on the  $\alpha$ -tubulin CTT. We confirmed the extent of these modifications by mass spectrometry and Western blot. An advantage of our method of purifying differential-modified samples of tubulin is that our approach allows for sufficient quantities for NMR experiments (8,56,57). We determined that polyglycylation and polyglutamylation do not change the number of protofilaments incorporated into the microtubule lattice and therefore do not significantly affect the size of microtubules.

Despite having the same distribution in the number of protofilaments, we found significant differences in the

measured persistence lengths of polyglycylated and polyglutamylated microtubules in the presence of both 1 and 10 mM magnesium ( $p = 0.045$  and  $p = 0.021$ , respectively). At intermediate concentrations, the addition of magnesium caused the polyglycylated microtubules to become stiffer, but then at very high concentrations, the microtubule's rigidity decreased. This effect may be due to the proposed collapsed conformation of the CTTs upon polyglycylation (48). In this case, the collapsed tail would interact more strongly with the tubulin body, an interaction that is reduced in the presence of a high concentration of magnesium.

A clear dependence of the  $R_2$   $^{15}\text{N}$ -relaxation rates of the  $\alpha$ -tubulin CTTs as a function of distance along the tail from the tubulin body surface suggests that the  $\alpha$ -tubulin CTT residues interact with the tubulin body, consistent with previous simulation (58). This interaction could explain the importance of polyglycylation of the  $\alpha$ -tubulin CTT on microtubule stiffness. The  $\alpha$ -tubulin CTT projects toward the adjacent dimer, supporting the view that interdimer rather than intradimer interactions dominate the bending rigidity (59).

Polyglycylation on the CTTs contributes to the overall stiffness and structural integrity of ciliary microtubules. The depletion of TTLL3 enzymes leads to destabilization of already assembled cilia in *T. thermophila* (29) and reduced frequency of primary cilia in mammalian cells (24,31). In *Tetrahymena*, the TTLL3(A-F)-KO strain (lacking polyglycylation) has poor growth, shorter cilia, and failure to elongate cilia in the presence of taxol (29). Polyglycylation is thought to be localized primarily on the B-tubules within cilia, whereas the A-tubules are predominantly unmodified (60). The tips of cilia contain microtubules with no polyglycylation (60). Although polyglutamylation is localized to the outer doublets in cilia and missing from the central pair (61), excessive polyglutamylation results in unstable and short cilia (62). The depletion of glycine ligases results in hyperglutamylation and vice versa, making interpretation of any phenotype difficult. For example, hyperglutamylation stimulates katanin and spastin activity (19) and causes misregulation of tubulin turnover (40). Extrinsic factors such as MAPs contribute to ciliary stiffness (44,63). The intrinsic differences in flexibility solely because of the modifications suggest a possible role for polyglycylation, especially in cellular structures undergoing high stresses such as the cilia.

Post-translational modifications play a significant role in the regulation of microtubules. We demonstrate that post-translational modifications can alter the intrinsic flexibility of microtubules. Although the  $\alpha$ - and  $\beta$ -tubulin CTTs often contain similar modifications, they show different spin dynamics and may contribute differently to the stiffness of the microtubule. Our results provide insight into the complex mechanism of how polyglycylation and polyglutamylation alter microtubule mechanical properties.

## SUPPORTING MATERIAL

Supporting Material can be found online at <https://doi.org/10.1016/j.bpj.2020.09.040>.

## AUTHOR CONTRIBUTIONS

K.P.W., T.L.H., and L.H. designed research, performed research, analyzed data, and wrote the manuscript. H.H. analyzed flexural rigidity data. T.L. collected and analyzed mass spectrometry data. C.P. collected and analyzed electron microscopy data.

## ACKNOWLEDGMENTS

We thank Jacek Gaertig (University of Georgia) for his generous gift of *T. thermophila* strains and polyglutamylation antibody. We thank the University of Colorado Boulder Central Analytical Mass Spectrometry Core Facility for performing LC MS/MS experiments. We thank Joe Dragavon (BioFrontiers Institute, University of Colorado Boulder) for his training and expertise. Electron microscopy was done at the University of Colorado Boulder EM Services Core Facility, with the technical assistance of Gerry Morgan. We would also like to acknowledge J. Richard McIntosh (University of Colorado Boulder), Chad Pearson (University of Colorado, Anschutz Medical Campus), and Dan Sackett (National Institute of Health) for advice.

This work was performed with support from National Institutes of Health R35 GM119755 and T32 GM065103. This work utilized Thermo Fisher Scientific LTQ Orbitrap velos that was purchased with funding from W.M. Keck Foundation. The imaging work was performed at the BioFrontiers Institute Advanced Light Microscopy Core. Spinning disk confocal microscopy was performed on Nikon Ti-E microscope supported by the BioFrontiers Institute and the Howard Hughes Medical Institute. The 800 MHz spectrometer was purchased and supported by the National Institutes of Health (RR011969 and RR16649) and the National Science Foundation (DBI-0230966 and 960241).

## REFERENCES

- Desai, A., and T. J. Mitchison. 1997. Microtubule polymerization dynamics. *Annu. Rev. Cell Dev. Biol.* 13:83–117.
- Inoué, S. 1996. Mitotic organization and force generation by assembly/disassembly of microtubules. *Cell Struct. Funct.* 21:375–379.
- Kapitein, L. C., and C. C. Hoogenraad. 2015. Building the neuronal microtubule cytoskeleton. *Neuron.* 87:492–506.
- Barlan, K., and V. I. Gelfand. 2017. Microtubule-based transport and the distribution, tethering, and organization of organelles. *Cold Spring Harb. Perspect. Biol.* 9:a025817.
- Haimo, L. T., and J. L. Rosenbaum. 1981. Cilia, flagella, and microtubules. *J. Cell Biol.* 91:125s–130s.
- Gadadhar, S., S. Bodakuntla, ..., C. Janke. 2017. The tubulin code at a glance. *J. Cell Sci.* 130:1347–1353.
- Roll-Mecak, A. 2015. Intrinsically disordered tubulin tails: complex tuners of microtubule functions? *Semin. Cell Dev. Biol.* 37:11–19.
- Wall, K. P., M. Pagratis, ..., L. E. Hough. 2016. Molecular determinants of tubulin's C-terminal tail conformational ensemble. *ACS Chem. Biol.* 11:2981–2990.
- Szyk, A., A. M. Deaconescu, ..., A. Roll-Mecak. 2014. Molecular basis for age-dependent microtubule acetylation by tubulin acetyltransferase. *Cell.* 157:1405–1415.
- Xu, Z., L. Schaedel, ..., M. V. Nachury. 2017. Microtubules acquire resistance from mechanical breakage through intraluminal acetylation. *Science.* 356:328–332.

11. Gundersen, G. G., S. Khawaja, and J. C. Bulinski. 1987. Postpolymerization detyrosination of alpha-tubulin: a mechanism for subcellular differentiation of microtubules. *J. Cell Biol.* 105:251–264.
12. Webster, D. R., J. Wehland, ..., G. G. Borisy. 1990. Detyrosination of alpha tubulin does not stabilize microtubules in vivo. *J. Cell Biol.* 111:113–122.
13. Geuens, G., G. G. Gundersen, ..., M. DeBrabander. 1986. Ultrastructural colocalization of tyrosinated and detyrosinated alpha-tubulin in interphase and mitotic cells. *J. Cell Biol.* 103:1883–1893.
14. Kerr, J. P., P. Robison, ..., C. W. Ward. 2015. Detyrosinated microtubules modulate mechanotransduction in heart and skeletal muscle. *Nat. Commun.* 6:8526.
15. Orbach, R., and J. Howard. 2019. The dynamic and structural properties of axonemal tubulins support the high length stability of cilia. *Nat. Commun.* 10:1838.
16. Audebert, S., E. Desbruyères, ..., B. Eddé. 1993. Reversible polyglutamylation of alpha- and beta-tubulin and microtubule dynamics in mouse brain neurons. *Mol. Biol. Cell.* 4:615–626.
17. Magiera, M. M., P. Singh, ..., C. Janke. 2018. Tubulin posttranslational modifications and emerging links to human disease. *Cell.* 173:1323–1327.
18. Lacroix, B., J. van Dijk, ..., C. Janke. 2010. Tubulin polyglutamylation stimulates spastin-mediated microtubule severing. *J. Cell Biol.* 189:945–954.
19. Valenstein, M. L., and A. Roll-Mecak. 2016. Graded control of microtubule severing by tubulin glutamylation. *Cell.* 164:911–921.
20. Shin, S. C., S.-K. Im, ..., E. E. Kim. 2019. Structural and molecular basis for katanin-mediated severing of glutamylated microtubules. *Cell Rep.* 26:1357–1367.e5.
21. Bré, M. H., V. Redeker, ..., N. Levilliers. 1996. Axonemal tubulin polyglycylation probed with two monoclonal antibodies: widespread evolutionary distribution, appearance during spermatozoan maturation and possible function in motility. *J. Cell Sci.* 109:727–738.
22. Levilliers, N., A. Fleury, and A. M. Hill. 1995. Monoclonal and polyclonal antibodies detect a new type of post-translational modification of axonemal tubulin. *J. Cell Sci.* 108:3013–3028.
23. Rogowski, K., F. Juge, ..., C. Janke. 2009. Evolutionary divergence of enzymatic mechanisms for posttranslational polyglycylation. *Cell.* 137:1076–1087.
24. Gadadhar, S., H. Dadi, ..., C. Janke. 2017. Tubulin glycylation controls primary cilia length. *J. Cell Biol.* 216:2701–2713.
25. Junker, A. D., A. W. J. Soh, ..., C. G. Pearson. 2019. Microtubule glycylation promotes attachment of basal bodies to the cell cortex. *J. Cell Sci.* 132:jcs233726.
26. Wloga, D., K. Rogowski, ..., J. Gaertig. 2008. Glutamylation on alpha-tubulin is not essential but affects the assembly and functions of a subset of microtubules in *Tetrahymena thermophila*. *Eukaryot. Cell.* 7:1362–1372.
27. Ikegami, K., S. Sato, ..., M. Setou. 2010. Tubulin polyglutamylation is essential for airway ciliary function through the regulation of beating asymmetry. *Proc. Natl. Acad. Sci. USA.* 107:10490–10495.
28. Bosch Grau, M., C. Masson, ..., C. Janke. 2017. Alterations in the balance of tubulin glycylation and glutamylation in photoreceptors leads to retinal degeneration. *J. Cell Sci.* 130:938–949.
29. Wloga, D., D. M. Webster, ..., J. Gaertig. 2009. TTL3 Is a tubulin glycine ligase that regulates the assembly of cilia. *Dev. Cell.* 16:867–876.
30. Redeker, V., N. Levilliers, ..., M.-H. Bré. 2005. Mutations of tubulin glycylation sites reveal cross-talk between the C termini of alpha- and beta-tubulin and affect the ciliary matrix in *Tetrahymena*. *J. Biol. Chem.* 280:596–606.
31. Rocha, C., L. Papon, ..., C. Janke. 2014. Tubulin glycylation is required for primary cilia, control of cell proliferation and tumor development in colon. *EMBO J.* 33:2247–2260.
32. Widlund, P. O., M. Podolski, ..., D. N. Drechsel. 2012. One-step purification of assembly-competent tubulin from diverse eukaryotic sources. *Mol. Biol. Cell.* 23:4393–4401.
33. Mastronarde, D. N. 2005. Automated electron microscope tomography using robust prediction of specimen movements. *J. Struct. Biol.* 152:36–51.
34. Schneider, C. A., W. S. Rasband, and K. W. Eliceiri. 2012. NIH Image to ImageJ: 25 years of image analysis. *Nat. Methods.* 9:671–675.
35. Hawkins, T. L., M. Mirigian, ..., J. L. Ross. 2012. Perturbations in microtubule mechanics from tubulin preparation. *Cell. Mol. Bioeng.* 5:227–238.
36. Harris, B. J., J. L. Ross, and T. L. Hawkins. 2018. Microtubule seams are not mechanically weak defects. *Phys. Rev. E.* 97:062408.
37. Hawkins, T. L., D. Sept, ..., J. L. Ross. 2013. Mechanical properties of doubly stabilized microtubule filaments. *Biophys. J.* 104:1517–1528.
38. R Development Core Team. 2011. R: A Language and Environment for Statistical Computing. R Foundation for Statistical Computing, Vienna, Austria.
39. Vranken, W. F., W. Boucher, ..., E. D. Laue. 2005. The CCPN data model for NMR spectroscopy: development of a software pipeline. *Proteins.* 59:687–696.
40. Xia, L., B. Hai, ..., J. Gaertig. 2000. Polyglycylation of tubulin is essential and affects cell motility and division in *Tetrahymena thermophila*. *J. Cell Biol.* 149:1097–1106.
41. Biemann, K., and S. A. Martin. 1987. Mass spectrometric determination of the amino acid sequence of peptides and proteins. *Mass Spectrom. Rev.* 6:1–75.
42. Schweppe, R. E., C. E. Haydon, ..., N. G. Ahn. 2003. The characterization of protein post-translational modifications by mass spectrometry. *Acc. Chem. Res.* 36:453–461.
43. Gittes, F., B. Mickey, ..., J. Howard. 1993. Flexural rigidity of microtubules and actin filaments measured from thermal fluctuations in shape. *J. Cell Biol.* 120:923–934.
44. Mickey, B., and J. Howard. 1995. Rigidity of microtubules is increased by stabilizing agents. *J. Cell Biol.* 130:909–917.
45. Massey, F. J., Jr. 1951. The Kolmogorov-smirnov test for goodness of fit. *J. Am. Stat. Assoc.* 46:68–78.
46. Eshun-Wilson, L., R. Zhang, ..., E. Nogales. 2019. Effects of  $\alpha$ -tubulin acetylation on microtubule structure and stability. *Proc. Natl. Acad. Sci. USA.* 116:10366–10371.
47. Bouxsein, N. F., and G. D. Bachand. 2014. Single filament behavior of microtubules in the presence of added divalent counterions. *Bio-macromolecules.* 15:3696–3705.
48. Tran, H. T., A. Mao, and R. V. Pappu. 2008. Role of backbone-solvent interactions in determining conformational equilibria of intrinsically disordered proteins. *J. Am. Chem. Soc.* 130:7380–7392.
49. Ray, S., E. Meyhöfer, ..., J. Howard. 1993. Kinesin follows the microtubule's protofilament axis. *J. Cell Biol.* 121:1083–1093.
50. Jensen, M. R., R. W. Ruigrok, and M. Blackledge. 2013. Describing intrinsically disordered proteins at atomic resolution by NMR. *Curr. Opin. Struct. Biol.* 23:426–435.
51. Rostovtseva, T. K., K. L. Sheldon, ..., D. L. Sackett. 2008. Tubulin binding blocks mitochondrial voltage-dependent anion channel and regulates respiration. *Proc. Natl. Acad. Sci. USA.* 105:18746–18751.
52. Kikkawa, M., E. P. Sablin, ..., N. Hirokawa. 2001. Switch-based mechanism of kinesin motors. *Nature.* 411:439–445.
53. Protá, A. E., F. Danel, ..., M. O. Steinmetz. 2014. The novel microtubule-destabilizing drug BAL27862 binds to the colchicine site of tubulin with distinct effects on microtubule organization. *J. Mol. Biol.* 426:1848–1860.
54. Kay, L. E., L. K. Nicholson, ..., D. Torchia. 1992. Pulse sequences for removal of the effects of cross correlation between dipolar and chemical-shift anisotropy relaxation mechanisms on the measurement of heteronuclear T1 and T2 values in proteins. *J. Magn. Reson (1969).* 97:359–375.

55. Farrow, N. A., R. Muhandiram, ..., L. E. Kay. 1994. Backbone dynamics of a free and phosphopeptide-complexed Src homology 2 domain studied by 15N NMR relaxation. *Biochemistry*. 33:5984–6003.
56. Vemu, A., C. P. Garnham, ..., A. Roll-Mecak. 2014. Generation of differentially modified microtubules using in vitro enzymatic approaches. *Methods Enzymol*. 540:149–166.
57. Souphron, J., S. Bodakuntla, ..., M. M. Magiera. 2019. Purification of tubulin with controlled post-translational modifications by polymerization-depolymerization cycles. *Nat. Protoc*. 14:1634–1660.
58. Freedman, H., T. Luchko, ..., J. A. Tuszynski. 2011. Molecular dynamics modeling of tubulin C-terminal tail interactions with the microtubule surface. *Proteins*. 79:2968–2982.
59. Fedorov, V. A., P. S. Orekhov, ..., N. B. Gudimchuk. 2019. Mechanical properties of tubulin intra- and inter-dimer interfaces and their implications for microtubule dynamic instability. *PLoS Comput. Biol*. 15:e1007327.
60. Wloga, D., E. Joachimiak, ..., J. Gaertig. 2017. Posttranslational modifications of tubulin and cilia. *Cold Spring Harb. Perspect. Biol*. 9:a028159.
61. Suryavanshi, S., B. Eddé, ..., J. Gaertig. 2010. Tubulin glutamylation regulates ciliary motility by altering inner dynein arm activity. *Curr. Biol*. 20:435–440.
62. Wloga, D., D. Dave, ..., J. Gaertig. 2010. Hyperglutamylation of tubulin can either stabilize or destabilize microtubules in the same cell. *Eukaryot. Cell*. 9:184–193.
63. Felgner, H., R. Frank, ..., M. Schliwa. 1997. Domains of neuronal microtubule-associated proteins and flexural rigidity of microtubules. *J. Cell Biol*. 138:1067–1075.



**Biophysical Journal, Volume 119**

**Supplemental Information**

**C-Terminal Tail Polyglycylation and Polyglutamylation Alter Microtubule  
Mechanical Properties**

**Kathryn P. Wall, Harold Hart, Thomas Lee, Cynthia Page, Taviare L. Hawkins, and Loren  
E. Hough**

**C-terminal tail polyglycylation and polyglutamylation alter microtubule mechanical properties**  
Kathryn P. Wall, Harold Hart, Thomas Lee, Cynthia Page, Taviare L. Hawkins, and Loren Hough

**Supplementary Materials**

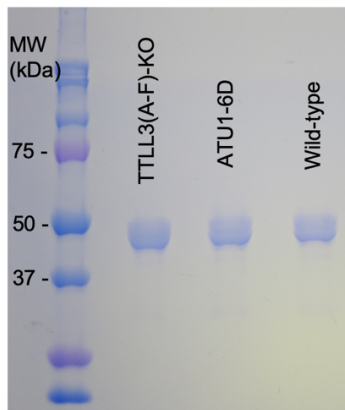

**Figure S1. SDS PAGE gel of tubulin purified from different *T. thermophila* strains.**

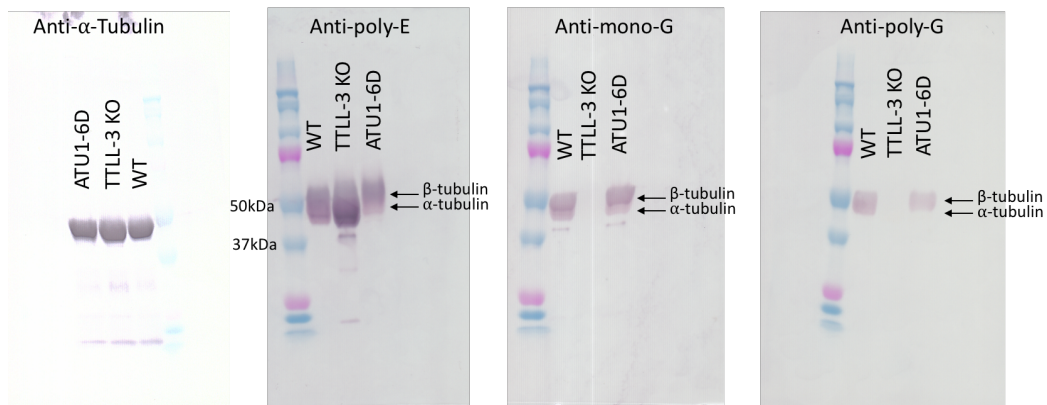

**Figure S2. Western blot of tubulin purified from different *T. thermophila* strains.** A qualitative western blot comparing the bulk modifications on each of the three tubulin pools purified from different strains of *T. thermophila*. The wild-type tubulin has all types of modifications detected. As expected and previously shown (Wloga et al., 2008, 2009), the TTLL3(A-F)-KO tubulin has increased glutamylation when compared to the wild-type tubulin and no apparent glycylation (either mono- or poly-). The ATU1-6D tubulin has limited modifications on the  $\alpha$ -subunit. There is a low degree of polyglutamylation and monoglycylation on  $\alpha$ -tubulin, but no polyglycylation detected.

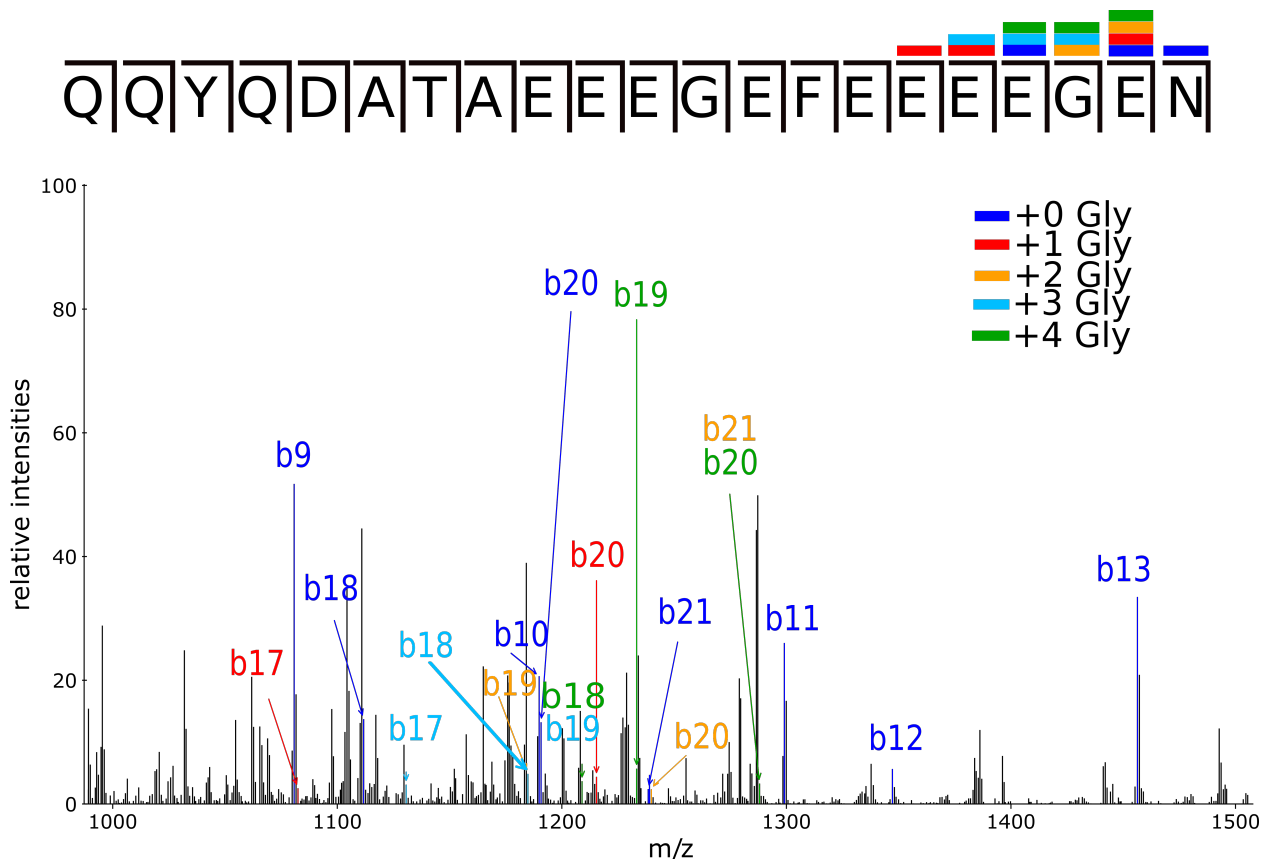

**Figure S3. Heterogeneous MS/MS mapping of purified cell body wild-type tubulin  $\beta$ -C-terminal tail peptide.** MS/MS spectra of the parent ion corresponding to mass of four additional glycine residues. The modification additions are heterogeneous with no clear single arrangement of glycine additions on this peptide. For simplicity, only the b-ions are labeled.

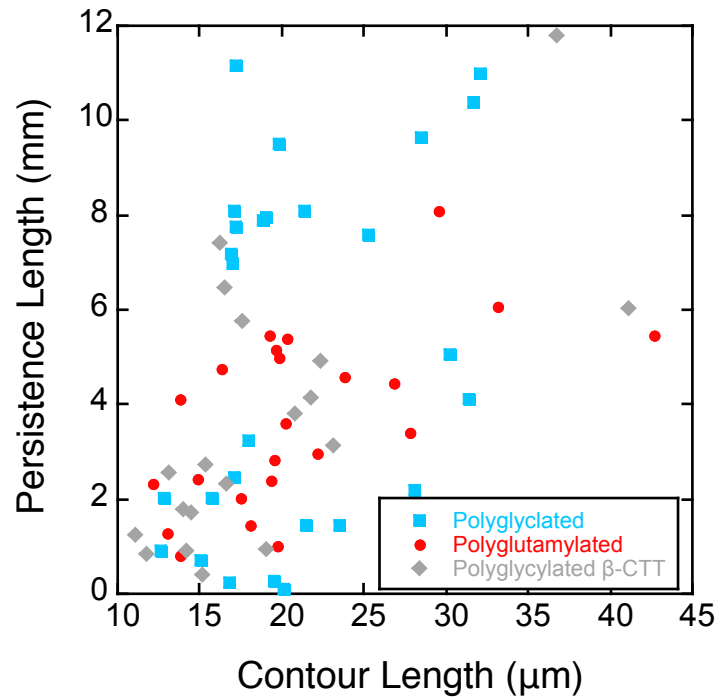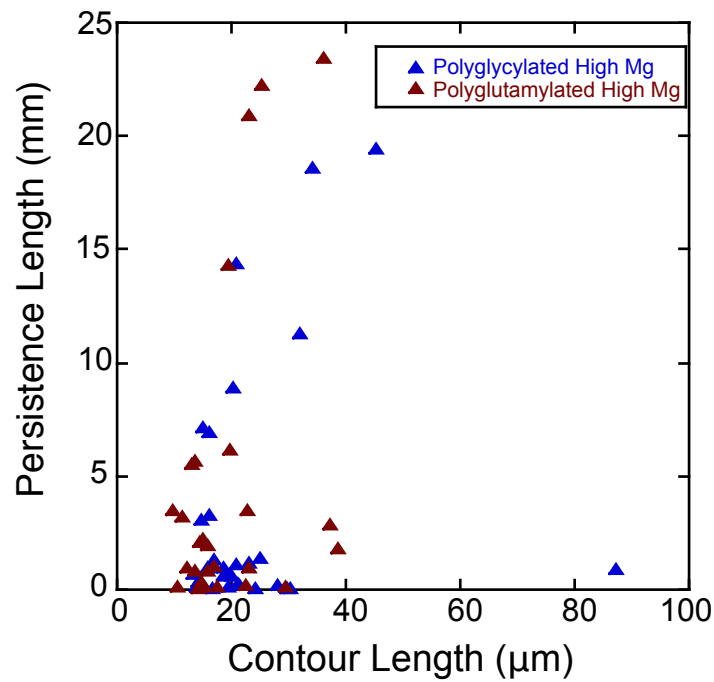

**Figure S4. Comparison of contour length versus persistence length.** (top) Scatter plot of contour length versus persistence length of microtubules in BRB80. (bottom) Scatter plot of contour length versus persistence length of microtubules in high magnesium conditions.



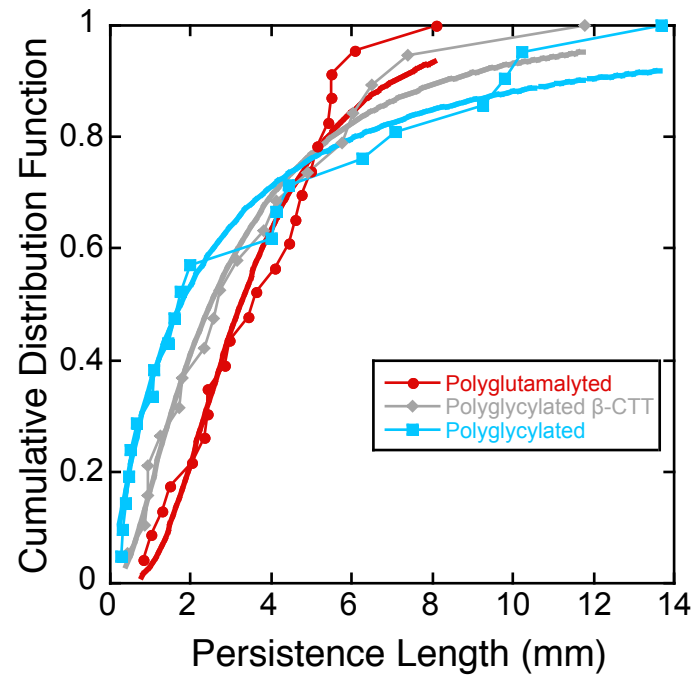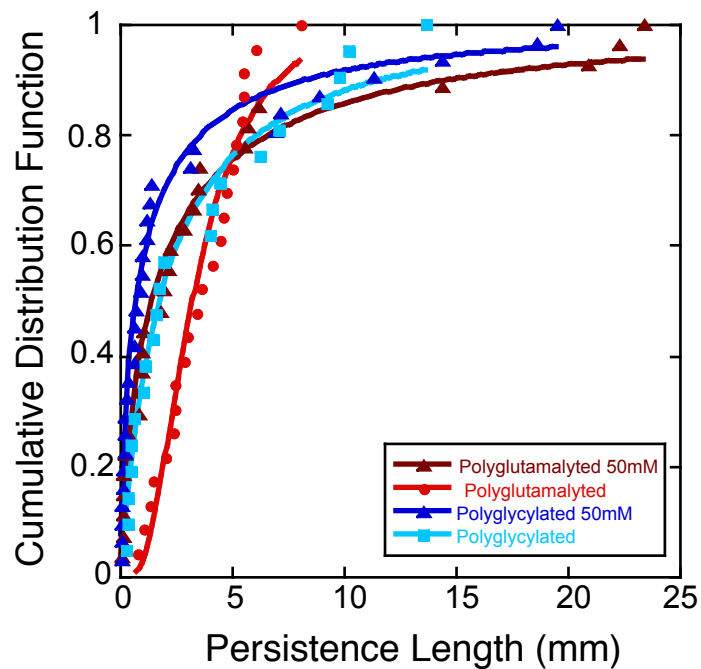

**Figure S5. Cumulative Distribution Functions with appropriate fits.** Function for CDF fit to  $f(x) = 0.5 \left\{ 1 + \operatorname{erf} \left[ \frac{\ln(x) - \mu}{\sqrt{2}\sigma} \right] \right\}$ . Microtubule persistence length distributions are normal or lognormal, so data is displayed as cumulative distribution functions (CDF). When compare to probability distribution function (PDF), CDFs require fewer fit parameters, produce less uncertainties in their fits, and do not involve user to binning the data.

**TABLE S1. Persistence length and fit parameters for cumulative distribution function of differentially-modified pools of *Tetrahymena tubulin*. Function for CDF fit to  $f(x) = 0.5 \left\{ 1 + \operatorname{erf} \left[ \frac{\ln(x) - \mu}{\sqrt{2}\sigma} \right] \right\}$ .**

|                                                                     | <i>MgCl</i> <sub>2</sub><br>[mM] | <i>n</i> | <i>L</i> <sub><i>p</i></sub><br>(mean,mm) | $\mu$         | $\sigma$      | $R^2$ |
|---------------------------------------------------------------------|----------------------------------|----------|-------------------------------------------|---------------|---------------|-------|
| WT (polyglycylated)                                                 | 1                                | 21       | 2.00 ± 0.19                               | 0.588±0.047   | 1.472± 0.073  | 0.98  |
| WT                                                                  | 5                                | 48       | 2.92 ±1.10                                | 1.137± 0.021  | 1.107± 0.035  | 0.98  |
| WT                                                                  | 10                               | 28       | 4.43 ± 1.16                               | 1.631± 0.068  | 1.351± 0.113  | 0.94  |
| WT                                                                  | 50                               | 31       | 0.90 ± 0.29                               | -0.283± 0.042 | 1.889± 0.073  | 0.98  |
| TLL3(A-F)KO<br>(polyglutamylated)                                   | 1                                | 23       | 3.18 ± 0.41                               | 1.19± 0.026   | 0.604± 0.043  | 0.96  |
| TLL3KO                                                              | 5                                | 29       | 2.28 ± 0.59                               | 0.843± 0.018  | 1.142± 0.032  | 0.99  |
| TLL3KO                                                              | 10                               | 22       | 2.36± 0.58                                | 0.882± 0.033  | 1.105± 0.0545 | 0.98  |
| TLL3KO                                                              | 50                               | 27       | 1.49 ± 0.50                               | 0.377± 0.052  | 1.817± 0.091  | 0.98  |
| ATU16D<br>(polyglycylated $\beta$ -CTT,<br>unmodified $\beta$ -CTT) | 1                                | 19       | 2.63 ± 0.53                               | 0.931± 0.027  | 0.938± 0.044  | 0.99  |

**Table S2. Pairwise significance values using a Kolmogorov–Smirnov test for differentially-modified pools of *Tetrahymena tubulin*.** Shaded boxes have  $p < 0.1$  (blue),  $p < 0.05$  (green) or  $p < 0.01$  (orange). The table is symmetric about the diagonal.

| cell strain |                         | WT     | WT     | WT     | WT     | TTLL3  | TTLL3  | TTLL3  | TTLL3  | ATU16D |
|-------------|-------------------------|--------|--------|--------|--------|--------|--------|--------|--------|--------|
|             | magnesium concentration | 1      | 5      | 10     | 50     | 1      | 5      | 10     | 50     | 1      |
| WT          | 1                       | 1      | 0.241  | 0.0592 | 0.1055 | 0.0449 | 0.7705 | 0.7019 | 0.5481 | 0.5899 |
| WT          | 5                       | 0.241  | 1      | 0.0159 | 0.0009 | 0.1831 | 0.6293 | 0.7571 | 0.1586 | 0.8138 |
| WT          | 10                      | 0.0592 | 0.0159 | 1      | 0.0012 | 0.0003 | 0.0146 | 0.0212 | 0.0038 | 0.004  |
| WT          | 50                      | 0.1055 | 0.0009 | 0.0012 | 1      | 0.0001 | 0.0092 | 0.0152 | 0.2229 | 0.0119 |
| TTLL3       | 1                       | 0.0449 | 0.1831 | 0.0003 | 0.0001 | 1      | 0.2452 | 0.2799 | 0.0446 | 0.7306 |
| TTLL3       | 5                       | 0.7705 | 0.6293 | 0.0146 | 0.0092 | 0.2452 | 1      | 0.9994 | 0.3608 | 0.9386 |
| TTLL3       | 10                      | 0.7019 | 0.7571 | 0.0212 | 0.0152 | 0.2799 | 0.9994 | 1      | 0.5125 | 0.9902 |
| TTLL3       | 50                      | 0.5481 | 0.1586 | 0.0038 | 0.2229 | 0.0446 | 0.3608 | 0.5125 | 1      | 0.2917 |
| ATU16D      | 1                       | 0.5899 | 0.8138 | 0.004  | 0.0119 | 0.7306 | 0.9386 | 0.9902 | 0.2917 | 1      |

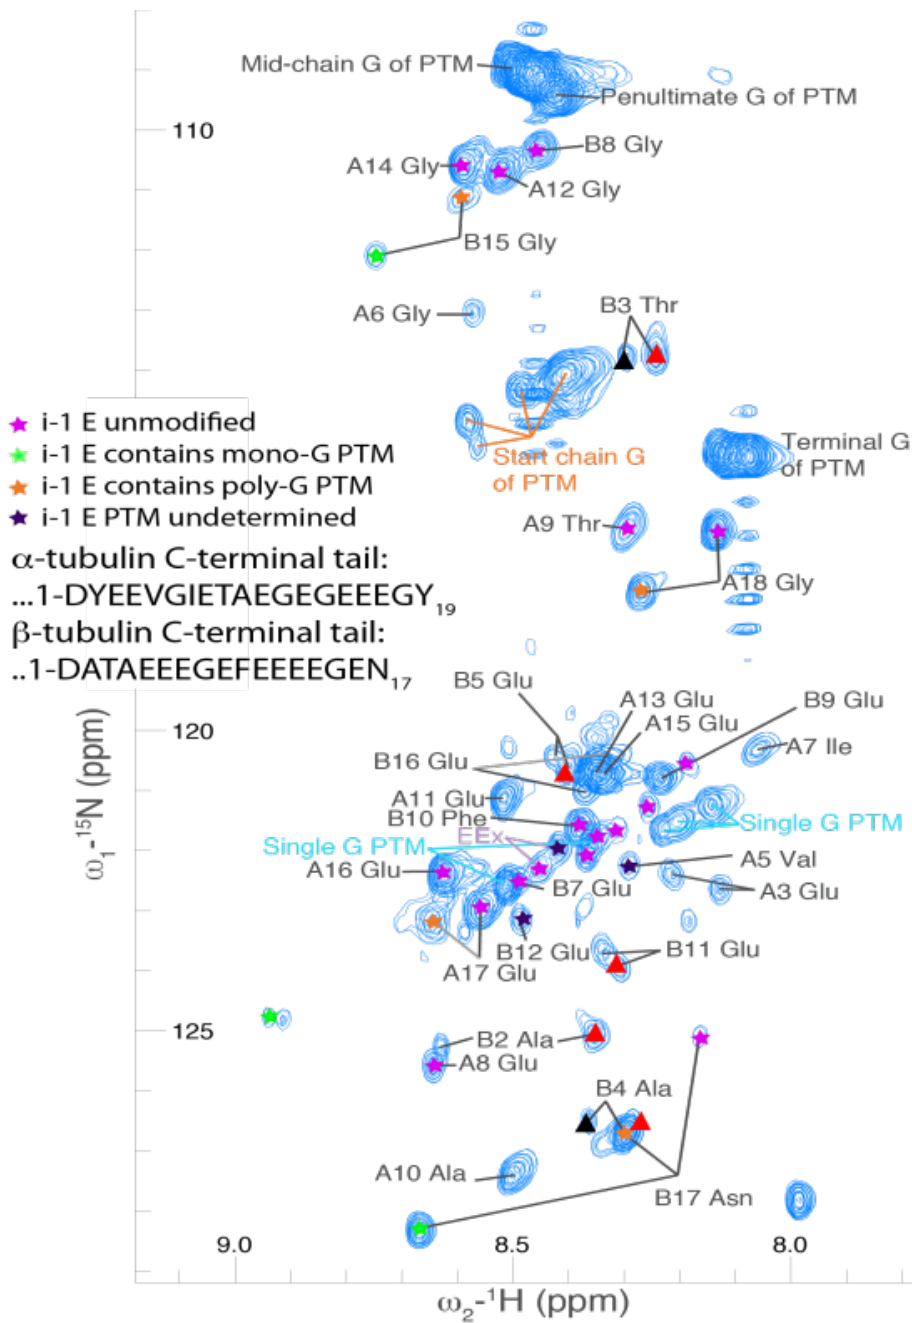

**Figure S6. Assignment of C-terminal tails of tubulin.** HNCOCY of C-terminal tails of tubulin annotated with the assigned peaks and corresponding modifications (Wall 2016). Added are the split chains from the beginning of the  $\beta$ -C-terminal tail (brighter peaks from the relaxation plots are labeled with red triangles, dimmer peaks are labeled with black triangles).



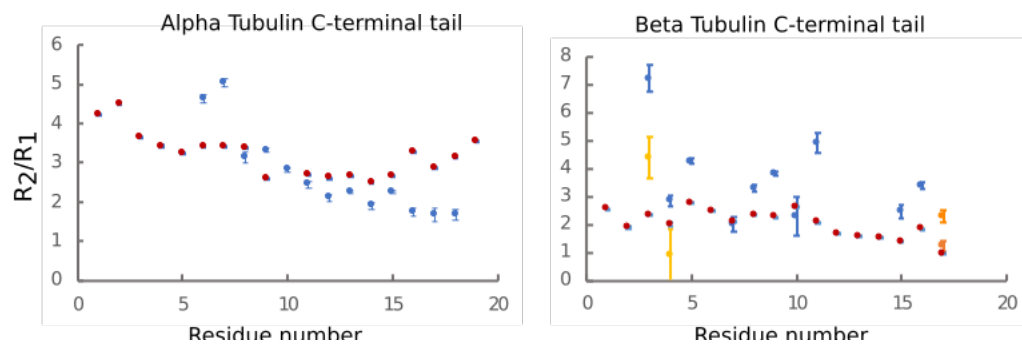

**Figure S7. R<sub>2</sub>/R<sub>1</sub> Relaxation.** Ratios of R<sub>2</sub>/R<sub>1</sub> plotted by residue number for the  $\alpha$  and  $\beta$ -C-terminal tails.
